# Supplementary material
Source: PubMed Central journal article supplement (PMC6988777)
Supplement: NIHMS1067922-supplement-Supplemental_Information.pdf [file NIHMS1067922-supplement-Supplemental_Information.pdf]

## Supplementary Materials for

### **Nucleotide exchange–dependent and nucleotide exchange–independent functions of plant heterotrimeric GTP-binding proteins**

Natsumi Maruta, Yuri Trusov, David Chakravorty, Daisuke Urano, Sarah M. Assmann, Jose R. Botella\*

\*Corresponding author. Email: j.botella@uq.edu.au

Published 5 November 2019, *Sci. Signal.* **12**, eaav9526 (2019)

DOI: 10.1126/scisignal.aav9526

#### **This PDF file includes:**

Fig. S1. Conserved motifs in G $\alpha$  subunits.

Fig. S2. In vitro BODIPY-GTP– and BODIPY-GDP–binding studies.

Fig. S3. Analysis of GTP $\gamma$ S binding to AtGPA1 and AtGPA1(S52C).

Fig. S4. Negative controls for BiFC assays.

Fig. S5. Assessment of interactions between AtRGS1 and AtGPA1 variants in planta.

Fig. S6. Assessment of the interaction between AtRGS1 and AGB1 in planta and of the effects of AGG subunits.

| PlantGα                           | Consensus    | G1           | G2        | G3    | G4   | G5          |
|-----------------------------------|--------------|--------------|-----------|-------|------|-------------|
|                                   |              | GxxxxGK(S/T) | DxxxxxxT  | DxxGQ | NKxD | (T/G)(C/S)A |
| <i>Arabidopsis thaliana</i>       |              | GAGESGKS     | DVLYARVRT | DVGGQ | NKFD | TTA         |
| <i>Brassica rapa</i>              |              | GAGESGKS     | DVLYARVRT | DVGGQ | NKFD | TTA         |
| <i>Boechera stricta</i>           |              | GAGESGKS     | DVLYARVRT | DVGGQ | NKFD | TTA         |
| <i>Amborella trichopoda</i>       |              | GAGESGKS     | DVLYSRVRT | DVGGQ | NKFD | TTA         |
| <i>Gossipium raimondii</i>        |              | GAGESGKS     | DVLYARVRT | DVGGQ | NKFD | TTA         |
| <i>Theobroma cacao</i>            |              | GAGESGKS     | DVLYARVRT | DVGGQ | NKFD | TTA         |
| <i>Citrus sinensis</i>            |              | GAGESGKS     | DVLYARVRT | DVGGQ | NKFD | TTA         |
| <i>Populus tremula</i>            |              | GAGDSGKS     | DVLYARVRT | DVGGQ | NKFD | TTA         |
| <i>Manihot esculenta</i>          |              | GAGDSGKS     | DILYARVRT | DVGGQ | NKFD | TTA         |
| <i>Vitis Vinifera</i>             |              | GAGESGKS     | DVLYARIRT | DVGGQ | NKFD | TTA         |
| <i>Solanum lycopersicum</i>       |              | GAGDSGKS     | DVLFARIRT | DVGGQ | NKFD | TTA         |
| <i>Fragaria vesca</i>             |              | GAGESGKS     | DVLYARVRT | DVGGQ | NKFD | TTA         |
| <i>Mimulus guttatus</i>           |              | GAGDSGKS     | DVLYARVRT | DVGGQ | NKFD | TTA         |
| <i>Aquilegia coerulea</i>         |              | GAGESGKS     | DVLYARVRT | DVGGQ | NKFD | TTA         |
| <i>Cucumis sativa</i>             |              | GAGESGKS     | DVLYARVRT | DVGGQ | NKFD | TTA         |
| <i>Pseudotsuga menziesii</i>      |              | GAGESGKS     | DVLYARVRT | DVGGQ | NKFD | TTA         |
| <i>Zea mays</i>                   |              | GAGESGKS     | DVLHARVRT | DVGGQ | NKFD | TTA         |
| <i>Sorghum bicolor</i>            |              | GAGESGKS     | DVLHARVRT | DVGGQ | NKFD | TTA         |
| <i>Oryza sativa</i>               |              | GAGESGKS     | DVLYARVRT | DVGGQ | NKFD | TTA         |
| <i>Ceratopteris richardii</i>     |              | GAGESGKS     | DILYARQQT | DVGGQ | NKYD | TTA         |
| <i>Selaginella moellendorffii</i> |              | GSGESGKS     | DILHARVRT | DVGGQ | NKYD | TTA         |
| <i>Sphagnum fallax</i>            |              | GAGESGKS     | DVLYARVRT | DVGGQ | NKFD | TTA         |
| <i>Marchantia polymorpha</i>      |              | GAGESGKS     | DVLFARVRT | DVGGQ | NKFD | TTA         |
| <i>Klebsormidium flaccidum</i>    |              | GAGESGKS     | DILFARVRT | DVGGQ | NKYD | TAT         |
| <b>Human Gα</b>                   |              |              |           |       |      |             |
|                                   | <i>GNAS</i>  | GAGESGKS     | DLLRCRVLT | DVGGQ | NKQD | TCA         |
|                                   | <i>GNAL</i>  | GAGESGKS     | DLLRCRVLT | DVGGQ | NKQD | TCA         |
|                                   | <i>GNAL2</i> | GAGESGKS     | DLLRCRVLT | DVGGQ | NKQD | TCA         |
|                                   | <i>GNA12</i> | GAGESGKS     | DILLARKAT | DVGGQ | NKMD | TTA         |
|                                   | <i>GNA13</i> | GAGESGKS     | DILLARRPT | DVGGQ | NKTD | TTA         |
|                                   | <i>GNAZ</i>  | GTSNSGKS     | DILRSRDMT | DVGGQ | NKKD | TCA         |
|                                   | <i>GNAT3</i> | GAGESGKS     | DVLHSRVKT | DVGGQ | NKKD | TCA         |
|                                   | <i>GNAT2</i> | GAGESGKS     | DVLRSRVKT | DVGGQ | NKKD | TCA         |
|                                   | <i>GNAT1</i> | GAGESGKS     | DVLRSRVKT | DVGGQ | NKKD | TCA         |
|                                   | <i>GNAO1</i> | GAGESGKS     | DILRTRVKT | DVGGQ | NKKD | TCA         |
|                                   | <i>GNAI1</i> | GAGESGKS     | DVLRTRVKT | DVGGQ | NKKD | TCA         |
|                                   | <i>GNAI2</i> | GAGESGKS     | DVLRTRVKT | DVGGQ | NKKD | TCA         |
|                                   | <i>GNA15</i> | GPGESGKS     | DVLRSRMPT | DVGGQ | NKTD | TCA         |
|                                   | <i>GNA14</i> | GTGESGKS     | DVLRVRVPT | DVGGQ | NKKD | TCA         |
|                                   | <i>GNAQ</i>  | GTGESGKS     | DVLRVRVPT | DVGGQ | NKKD | TCA         |
|                                   | <i>GNA11</i> | GTGESGKS     | DVLRVRVPT | DVGGQ | NKKD | TCA         |

**Fig. S1. Conserved motifs in Gα subunits.** Amino acid sequences of the G1 to G5 boxes of Gα subunits from the indicated plant species and from 16 human Gα subunits.

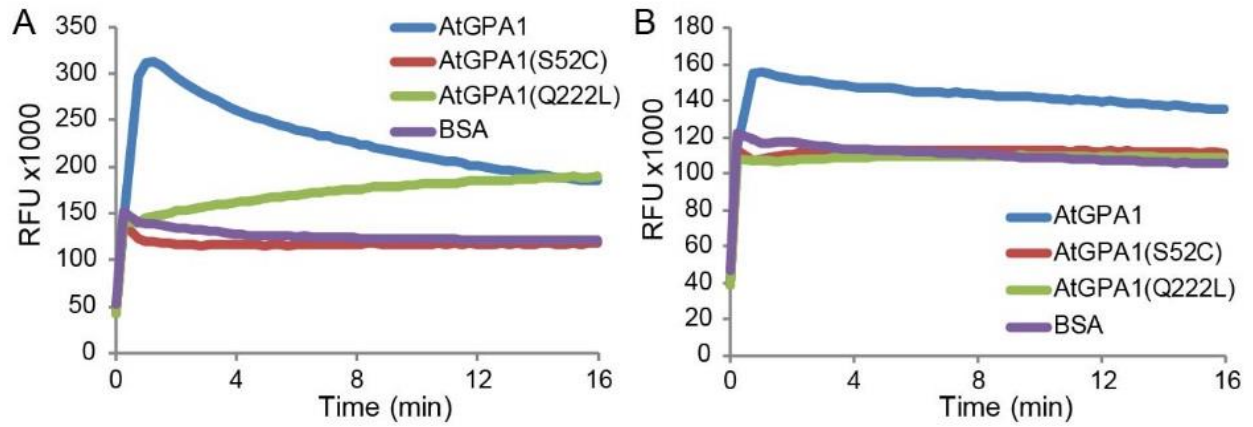

**Fig. S2. In vitro BODIPY-GTP- and BODIPY-GDP-binding studies.** (A and B) Relative fluorescence units (RFUs) were measured from the indicated purified AtGPA1 variants (GPA1, S52C, and Q222L) and BSA as a negative control bound to (A) BODIPY-GTP and (B) BODIPY-GDP for the indicate times. Data are representative of three experiments shown in raw (nonnormalized) values.

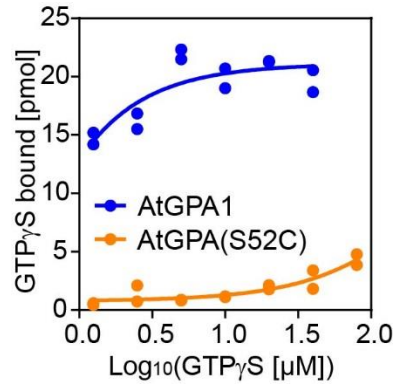

**Fig. S3. Analysis of GTP $\gamma$ S binding to AtGPA1 and AtGPA1(S52C).** AtGPA1 protein (blue) and AtGPA1(S52C) protein (orange) were incubated with the indicated concentrations of radiolabeled [ $^{35}$ S]-GTP $\gamma$ S and the amounts of bound GTP $\gamma$ S were determined. Data points are from two independent experiments.

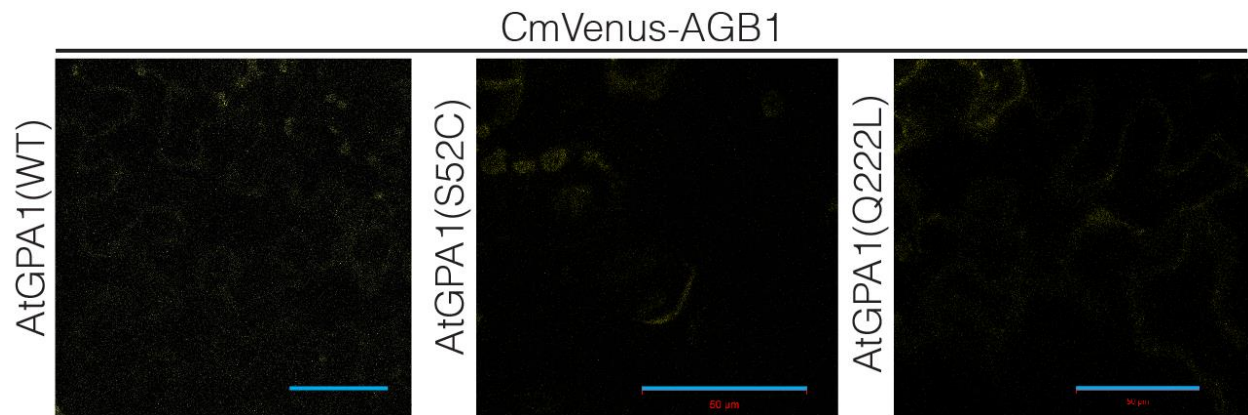

**Fig. S4. Negative controls for BiFC assays.** No yellow fluorescence was observed during co-expression of AtGPA1 variants tagged with NmVenus and AGB1 tagged with CmVenus without AGG3 in *N. benthamiana* leaves. Scale bars, 50  $\mu$ m.

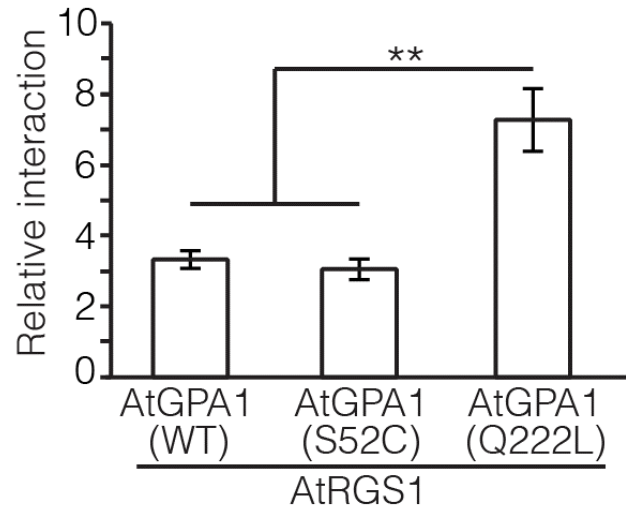

**Fig. S5. Assessment of interactions between AtRGS1 and AtGPA1 variants in planta.** Relative interaction strengths were assessed between the indicated AtGPA1 variants double-tagged with Cluc and HiBiT and AtRGS1 tagged with Nluc transiently expressed in *N. benthamiana* leaves. Data are means  $\pm$  SEM from six independent replicate experiments.  $**P < 0.01$  by one-way ANOVA with Tukey's multiple comparison.

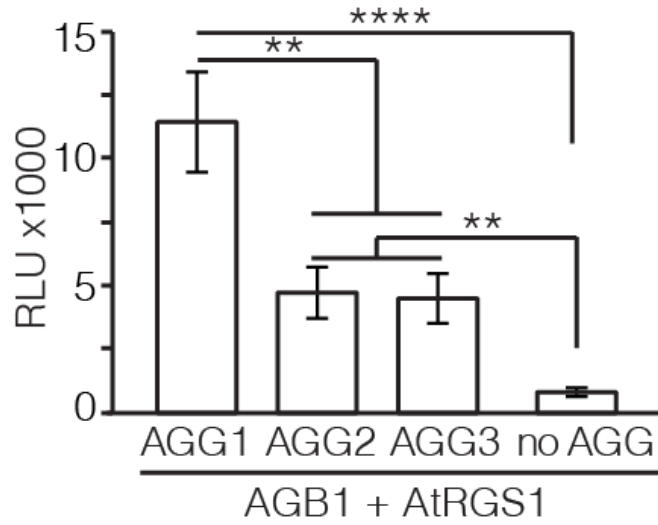

**Fig. S6. Assessment of the interaction between AtRGS1 and AGB1 in planta and of the effects of AGG subunits.** RLUs were measured from the activity of reconstituted firefly luciferase from Nluc-tagged AtRGS1 and Cluc-tagged AGB1. The effects of co-expression of mCherry-AGG1, -AGG2, and -AGG3 or of no AGG were assessed. Data are means  $\pm$  SEM from eight independent replicate experiments.  $**P < 0.01$  and  $****P < 0.0001$  by one-way ANOVA with Tukey's multiple comparison.
